# Supplementary material
Source: publisher figshare collection journal article supplement (https://tandf.figshare.com/articles/dataset/_/5598757)
Supplement: Supplementary file 1 [file 1]

## Supplemental File 2.

### Platelet function defects detected by LTA

#### 1A. Preoperative patients

| Patient number | LTA agonists*          |         |         |        |         |         |        |                        | Diagnosis        |
|----------------|------------------------|---------|---------|--------|---------|---------|--------|------------------------|------------------|
|                | ADP 5                  | ADP 10  | COL 1   | COL4   | EPI     | AA      | RIST   | TRAP                   |                  |
| 04             | normal                 | normal  | normal  | normal | reduced | normal  | normal | reduced and reversible | Thrombopathy NOS |
| 22             | reduced and reversible | normal  | delayed | normal | reduced | normal  | normal | normal                 | Thrombopathy NOS |
| 31             | reduced                | normal  | normal  | normal | reduced | delayed | normal | reduced and reversible | Thrombopathy NOS |
| 39             | delayed                | delayed | normal  | normal | normal  | delayed | normal | reduced and reversible | Thrombopathy NOS |
| 40             | reduced                | delayed | reduced | normal | normal  | reduced | normal | normal                 | Thrombopathy NOS |
| 44             | normal                 | normal  | absent  | normal | absent  | normal  | normal | normal                 | Thrombopathy NOS |
| 49             | normal                 | normal  | delayed | normal | normal  | normal  | normal | reduced and reversible | Thrombopathy NOS |
| 60             | delayed                | normal  | Reduced | normal | normal  | delayed | normal | normal                 | Thrombopathy NOS |
| 86             | delayed                | normal  | normal  | normal | normal  | normal  | normal | reduced and reversible | Thrombopathy NOS |
| 92             | delayed                | delayed | delayed | normal | normal  | normal  | normal | delayed                | Thrombopathy NOS |
| 99             | delayed                | normal  | reduced | normal | normal  | normal  | normal | normal                 | Thrombopathy NOS |
| 121            | delayed                | delayed | normal  | normal | normal  | normal  | normal | normal                 | Thrombopathy NOS |
| 139            | delayed                | delayed | normal  | normal | normal  | normal  | normal | normal                 | Thrombopathy NOS |
| 258            | delayed                | normal  | normal  | normal | normal  | normal  | normal | reduced and reversible | Thrombopathy NOS |
| 301            | normal                 | delayed | normal  | normal | normal  | normal  | normal | delayed                | Thrombopathy NOS |
| 332            | reduced                | normal  | Reduced | normal | normal  | normal  | normal | normal                 | Thrombopathy NOS |

#### 1B. Patients referred for bleeding evaluation

| Patient number | LTA agonists*          |         |         |         |         |         |         |         | Diagnosis        |
|----------------|------------------------|---------|---------|---------|---------|---------|---------|---------|------------------|
|                | ADP 5                  | ADP 10  | COL 1   | COL4    | EPI     | AA      | RIST    | TRAP    |                  |
| 07             | reduced and reversible | normal  | reduced | normal  | normal  | absent  | normal  | absent  | Thrombopathy NOS |
| 08             | reduced                | normal  | absent  | reduced | reduced | absent  | normal  | normal  | Thrombopathy NOS |
| 11             | normal                 | delayed | normal  | normal  | normal  | delayed | delayed | normal  | Thrombopathy NOS |
| 12             | normal                 | normal  | reduced | normal  | reduced | normal  | normal  | normal  | Thrombopathy NOS |
| 14             | normal                 | normal  | normal  | normal  | normal  | delayed | normal  | delayed | Thrombopathy NOS |
| 30             | delayed                | delayed | delayed | normal  | delayed | normal  | normal  | normal  | Thrombopathy NOS |

|    |         |        |         |        |        |         |        |         |                  |
|----|---------|--------|---------|--------|--------|---------|--------|---------|------------------|
| 33 | normal  | normal | normal  | normal | normal | delayed | normal | delayed | Thrombopathy NOS |
| 34 | reduced | normal | reduced | normal | normal | normal  | normal | normal  | Thrombopathy NOS |
| 36 | reduced | normal | normal  | normal | normal | absent  | normal | reduced | Thrombopathy NOS |
| 52 | reduced | normal | reduced | normal | normal | normal  | normal | normal  | Thrombopathy NOS |

### 1C. Patients with a diagnosed bleeding disorder

| Patient number | LTA agonists* |        |        |        |        |        |         |        | Diagnosis           |
|----------------|---------------|--------|--------|--------|--------|--------|---------|--------|---------------------|
|                | ADP5          | ADP10  | COL1   | COL4   | EPI    | AA     | RIST    | TRAP   |                     |
| 03             | absent        | absent | absent | absent | absent | absent | reduced | absent | Glanzmann's disease |
| 18             | absent        | absent | absent | absent | absent | absent | normal  | absent | Glanzmann's disease |
| 23             | absent        | absent | absent | absent | absent | absent | normal  | absent | Glanzmann's disease |

**Legend:** Platelet function defects detected by LTA in 3 patient groups (A-C). Absent: maximal aggregation <10%. Reduced: maximal aggregation <60%. Delayed: maximal aggregation not reached in 3 min (visually interpreted as delayed). Reversible: aggregation reverses to below 50% of maximal aggregation. \*LTA agonist concentrations: ADP 5  $\mu$ M and 10  $\mu$ M, Collagen 1  $\mu$ g/mL and 4  $\mu$ g/mL, EPI 10  $\mu$ M, Arachidonic acid 1 mM, Ristocetine 1.5 mg/ml and TRAP 15  $\mu$ M. **Abbreviations:** AA; arachidonic acid. ADP; adenosine diphosphate. COL; collagen. EPI; epinephrine. LTA; light transmission aggregometry. TRAP; thrombin receptor activating peptide.
