# Supplementary material
Source: publisher figshare collection journal article supplement (https://tandf.figshare.com/articles/dataset/_/5598757)
Supplement: Supplementary file 2 [file 1]

## Supplemental File 4.

**Two-by-two tables of Multiplate and PFA results regarding the detection of PFDs on LTA in patients with a diagnosed bleeding disorder**

| <b>A. Patients with a diagnosed bleeding disorder</b> | LTA $\geq 2$ abnormal curves | LTA $< 2$ abnormal curves | Total |
|-------------------------------------------------------|------------------------------|---------------------------|-------|
| Multiplate AUC any agonist low                        | 3                            | 0                         | 3     |
| Multiplate AUC all agonists normal                    | 0                            | 20                        | 20    |
| Total                                                 | 3                            | 20                        | 23    |

| <b>B. Patients with a diagnosed bleeding disorder</b> | LTA $\geq 2$ abnormal curves | LTA $< 2$ abnormal curves | Total |
|-------------------------------------------------------|------------------------------|---------------------------|-------|
| PFA EPI / ADP prolonged CT                            | 3                            | 3                         | 6     |
| PFA EPI / ADP normal CT                               | 0                            | 11                        | 11    |
| Total                                                 | 3                            | 14                        | 17    |

| <b>C. Patients with a diagnosed bleeding disorder</b> | LTA $\geq 2$ abnormal curves (%) | Sensitivity (95%CI) | Specificity (95%CI) | PPV (95%CI)  | NPV (95%CI)  |
|-------------------------------------------------------|----------------------------------|---------------------|---------------------|--------------|--------------|
| Multiplate                                            | 3 (13)                           | 100 (29-100)        | 100 (83-100)        | 100 (29-100) | 100 (83-100) |
| PFA                                                   | 3 (17)                           | 100 (83-100)        | 79 (49-95)          | 50 (12-88)   | 100 (72-100) |

**Legend:** Table A; two-by-two table of Multiplate and LTA results in patients with a diagnosed bleeding disorder. Table B; two-by-two table of PFA and LTA results in patients with a diagnosed bleeding disorder. Table C; overall test values for detection of PFDs in patients with a diagnosed bleeding disorder.

**Abbreviations:** ADP; adenosine diphosphate. AUC; area under the curve. CI; confidence interval. EPI; epinephrine. FN; false negative. FP; false positive. LTA; light transmission aggregometry. NPV; negative predictive value. PFA; platelet function analyzer. PPV; positive predictive value. TN; true negative. TP; true positive.
