# Supplementary material
Source: publisher figshare collection journal article supplement (https://tandf.figshare.com/articles/dataset/_/5598757)
Supplement: Supplementary file 3 [file 1]

## Supplemental File 5.

ROC curves of test performance of individual Multiplate agonists and PFA kits

Preoperative patients LTA AA – Multiplate ASPItest

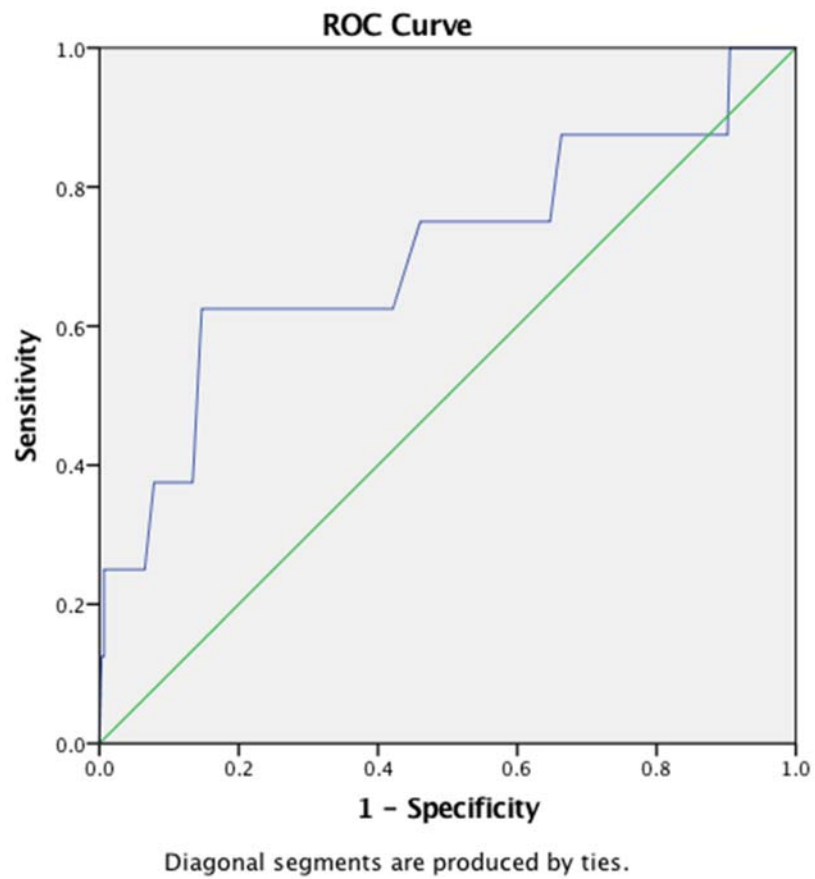

N=314 with 8 abnormal LTA AA curves. AUC 0.71, 95%CI 0.49-0.92, p=0.05

**Preoperative patients LTA TRAP – Multiplate TRAPtest**

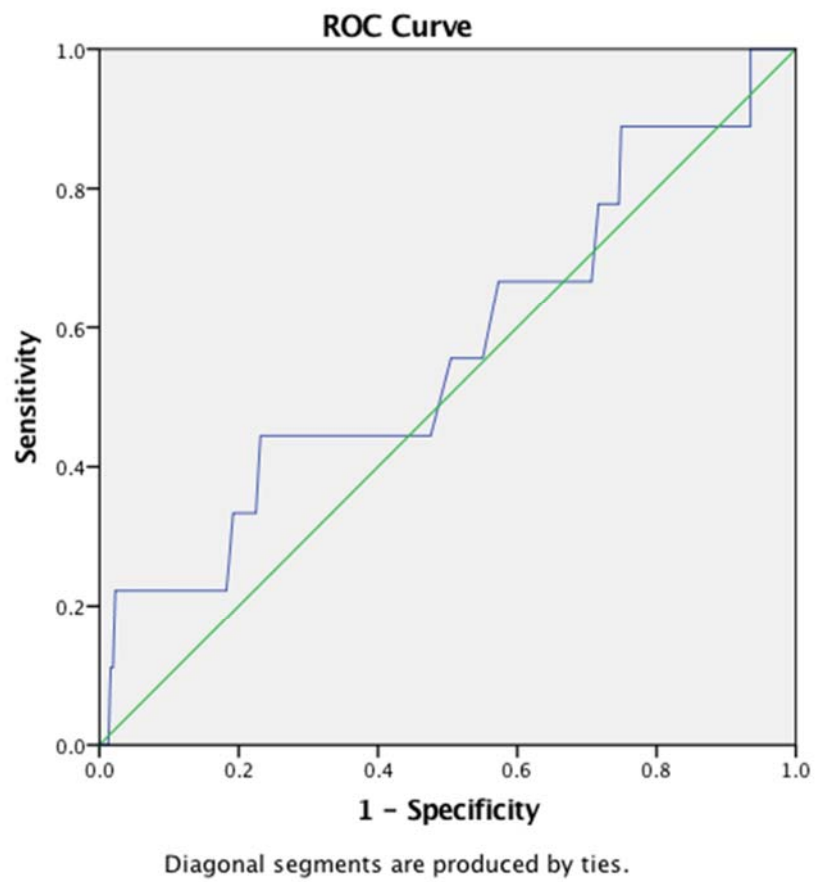

**N=316 with 9 abnormal LTA TRAP curves. AUC 0.57, 95%CI 0.36-0.78, p=0.49**

## Preoperative patients LTA COL – Multiplate COLtest

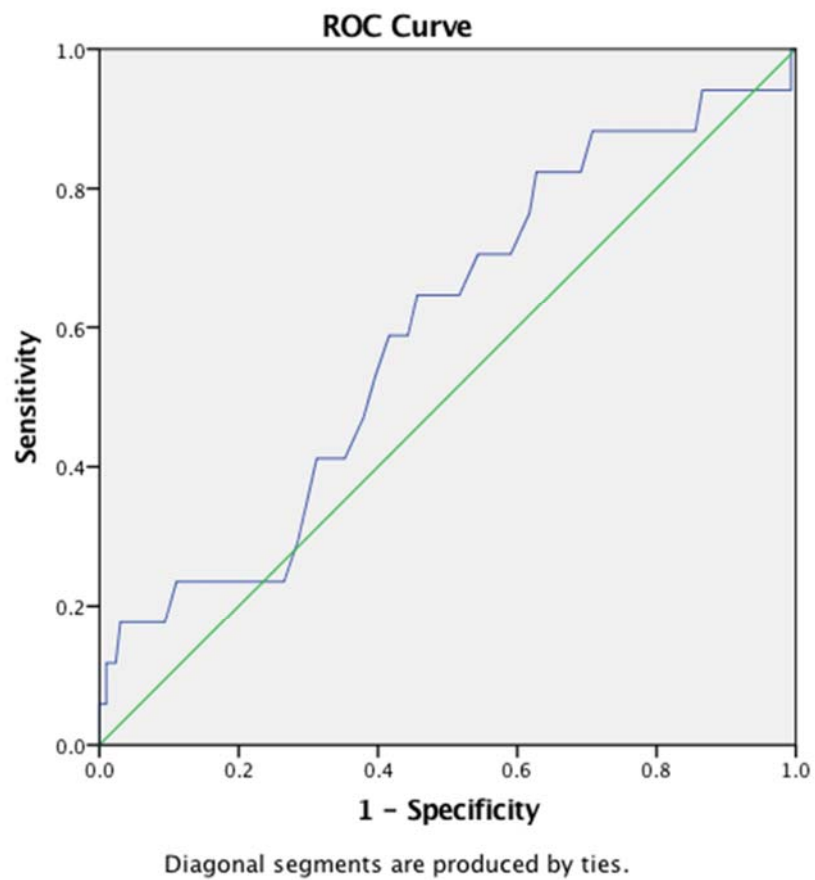

**N=315 with 17 abnormal LTA COL curves. AUC 0.59, 95%CI 0.46-0.73,  $p=0.20$**

If COL 1 microg/ml or 4 microg/ml or both collagen curves were abnormal, the LTA collagen result was considered 'abnormal'.

### Preoperative patients LTA ADP – Multiplate ADPtest

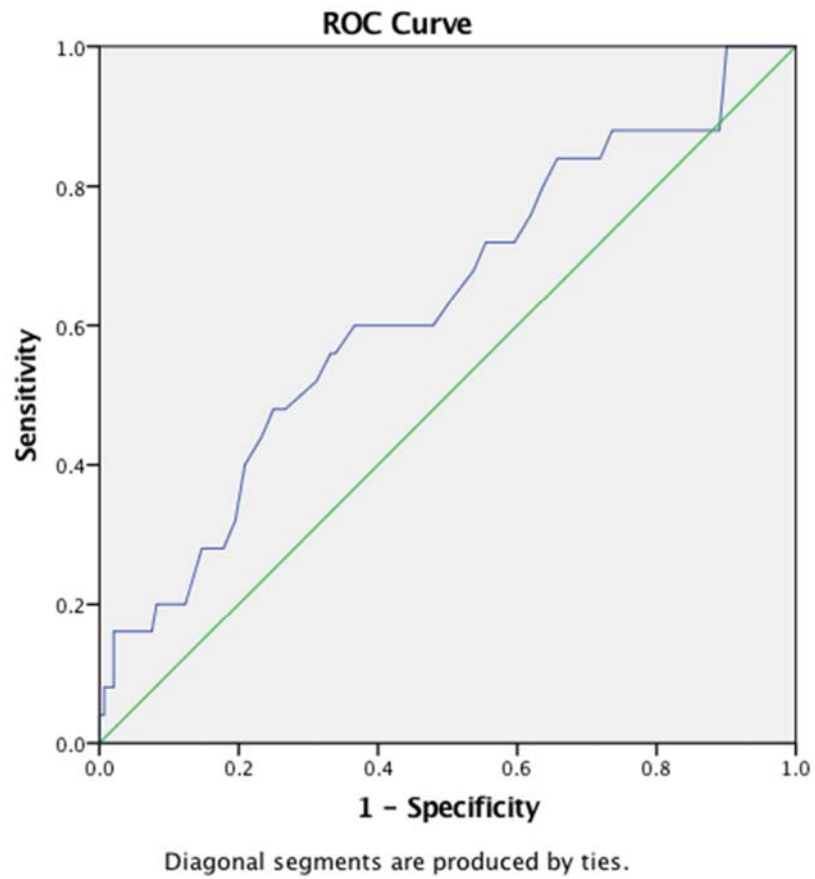

**N=317 with 25 abnormal LTA ADP curves. AUC 0.63 95%CI 0.51-0.75, p=0.03**

If ADP 5 microM, ADP 10 microM or both ADP curves were abnormal, the LTA ADP result was considered 'abnormal'.

**Patients referred for bleeding evaluation LTA AA - Multiplate ASPItest**

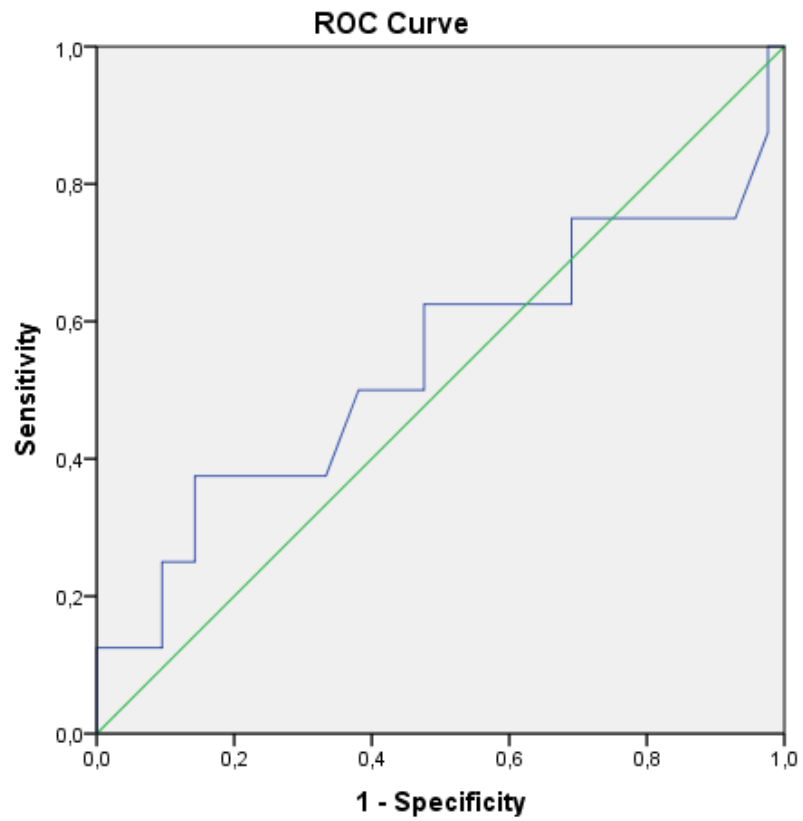

Diagonal segments are produced by ties.

**N= 50 with 8 abnormal LTA AA curves. AUC 0.54 95%CI 0.28-0.80, p = 0.73**

**Patients referred for bleeding evaluation LTA TRAP - Multiplate TRAPtest**

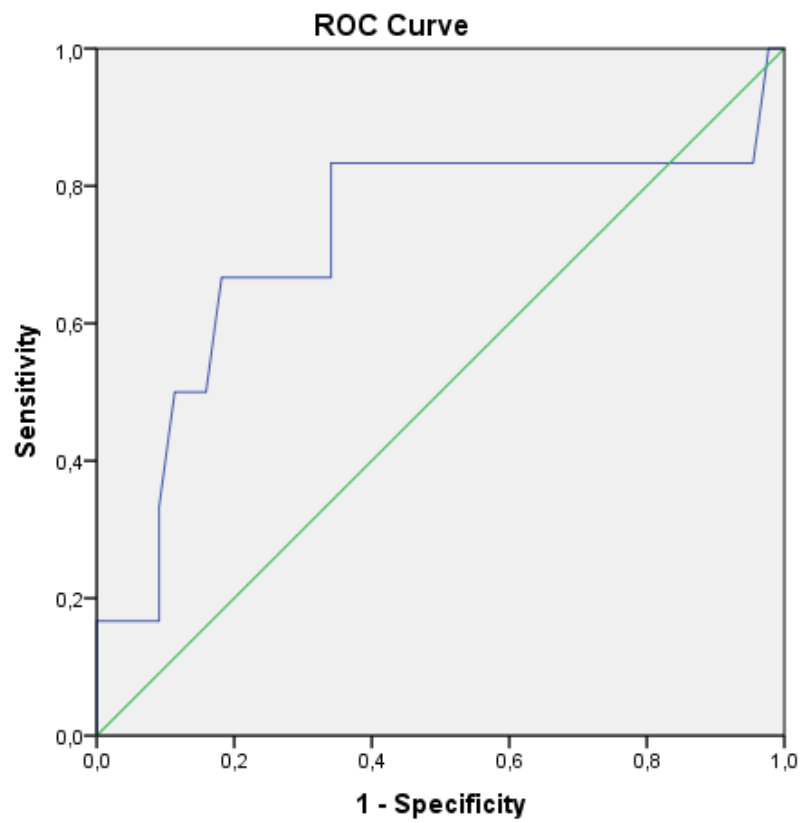

Diagonal segments are produced by ties.

**N= 50 with 6 abnormal LTA TRAP curves. AUC 0.72 95%CI 0.45-0.99, p = 0.08**

**Patients referred for bleeding evaluation LTA COL - Multiplate COLtest**

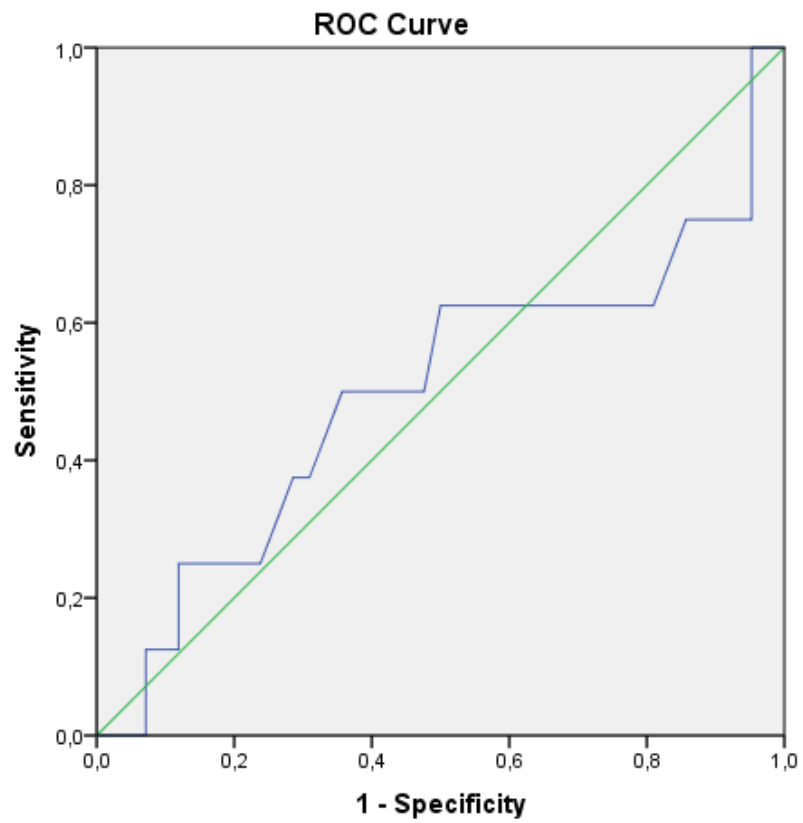

Diagonal segments are produced by ties.

**N= 50 with 8 abnormal LTA COL curves. AUC 0.50 95%CI 0.25-0.75, p = 0.99**

If COL 1 microg/ml or 4 microg/ml or both collagen curves were abnormal, the LTA collagen result was considered 'abnormal'.

**Patients referred for bleeding evaluation LTA ADP - Multiplate ADPtest**

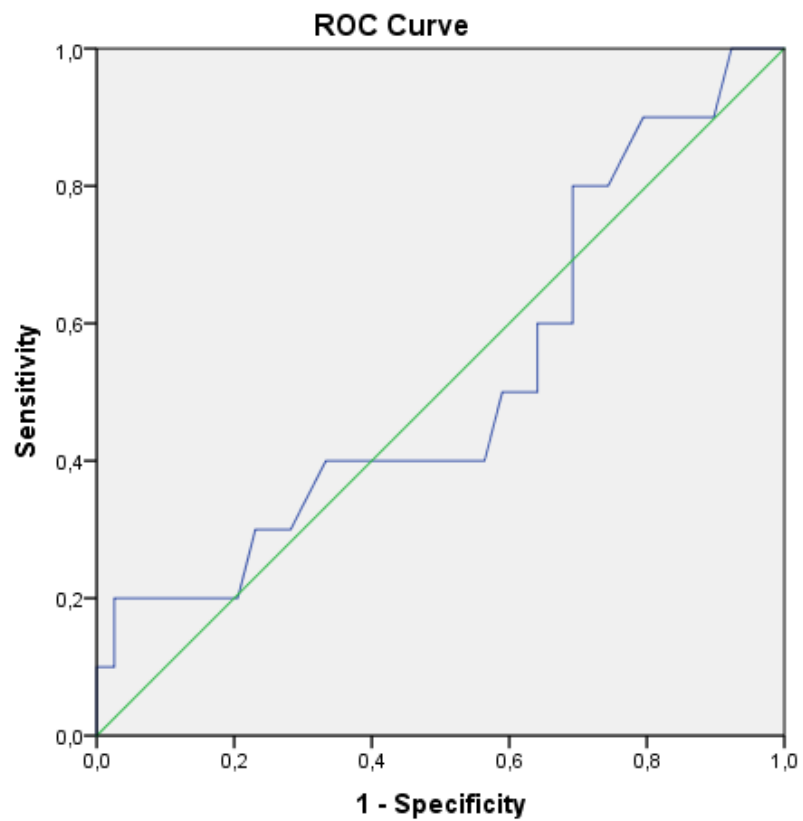

Diagonal segments are produced by ties.

**N= 49 with 10 abnormal LTA ADP curves. AUC 0.52 95%CI 0.31-0.73, p = 0.87**

If ADP 5 microM, ADP 10 microM or both ADP curves were abnormal, the LTA ADP result was considered 'abnormal'.



**Patients with a diagnosed bleeding disorder LTA AA - Multiplate ASPltest**

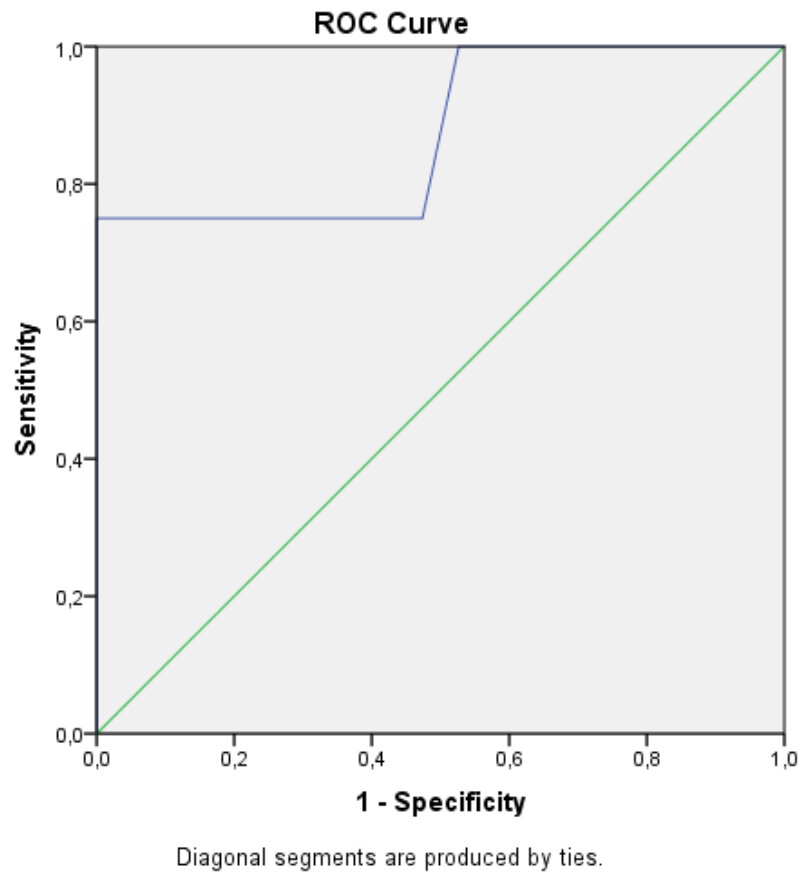

**N= 23 with 4 abnormal LTA AA curves. AUC 0.86 95% CI 0.65-1.00, p = 0.02**

**Patients with a diagnosed bleeding disorder LTA TRAP- Multiplate TRAPtest**

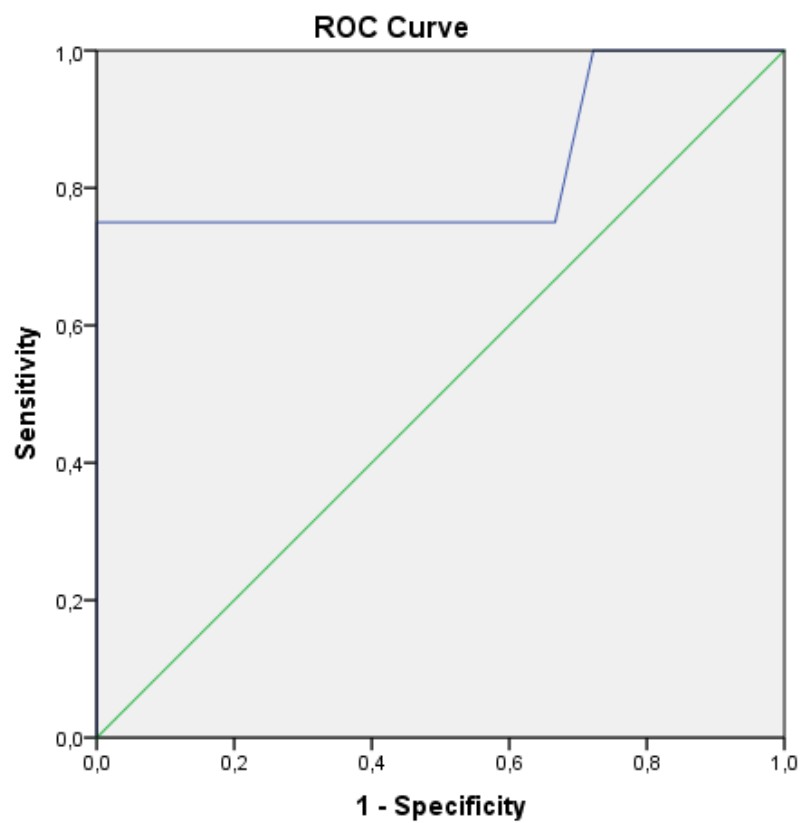

Diagonal segments are produced by ties.

**N= 22 with 4 abnormal LTA TRAP curves. AUC 0.83 95%CI 0.52-1.00, p = 0.05**

**Patients with a diagnosed bleeding disorder LTA COL - Multiplate COLtest**

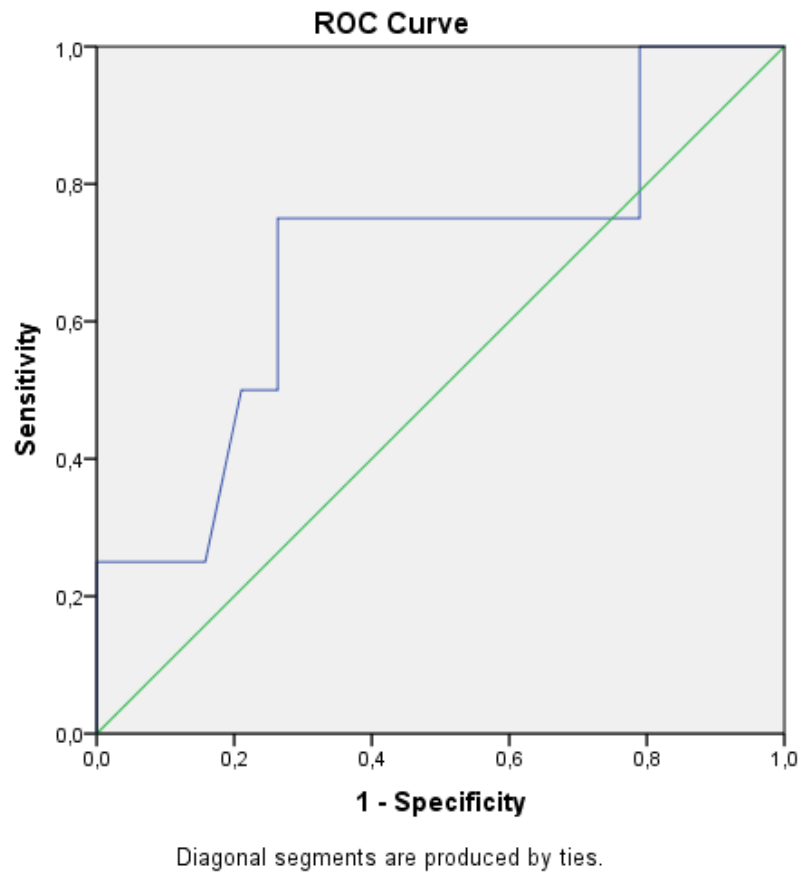

**N= 23 with 4 abnormal LTA COL curves. AUC 0.70 95%CI 0.38-1.00, p = 0.24**

If COL 1 microg/ml or 4 microg/ml or both collagen curves were abnormal, the LTA collagen result was considered 'abnormal'.

**Patients with a diagnosed bleeding disorder LTA ADP - Multiplate ADPtest**

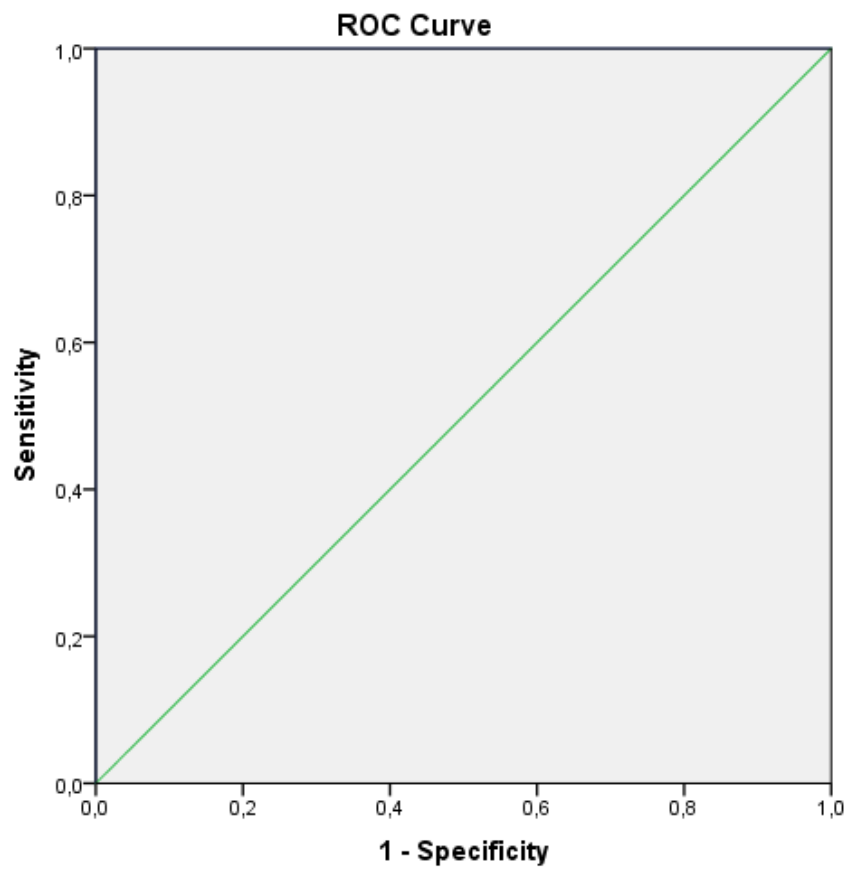

**N= 23 with 3 abnormal LTA ADP curves. AUC 1.00 (1.00-1.00), p = 0.01**

If ADP 5 microM, ADP 10 microM or both ADP curves were abnormal, the LTA ADP result was considered 'abnormal'.

**Preoperative patients LTA COL – PFA C-ADP/C-EPI**

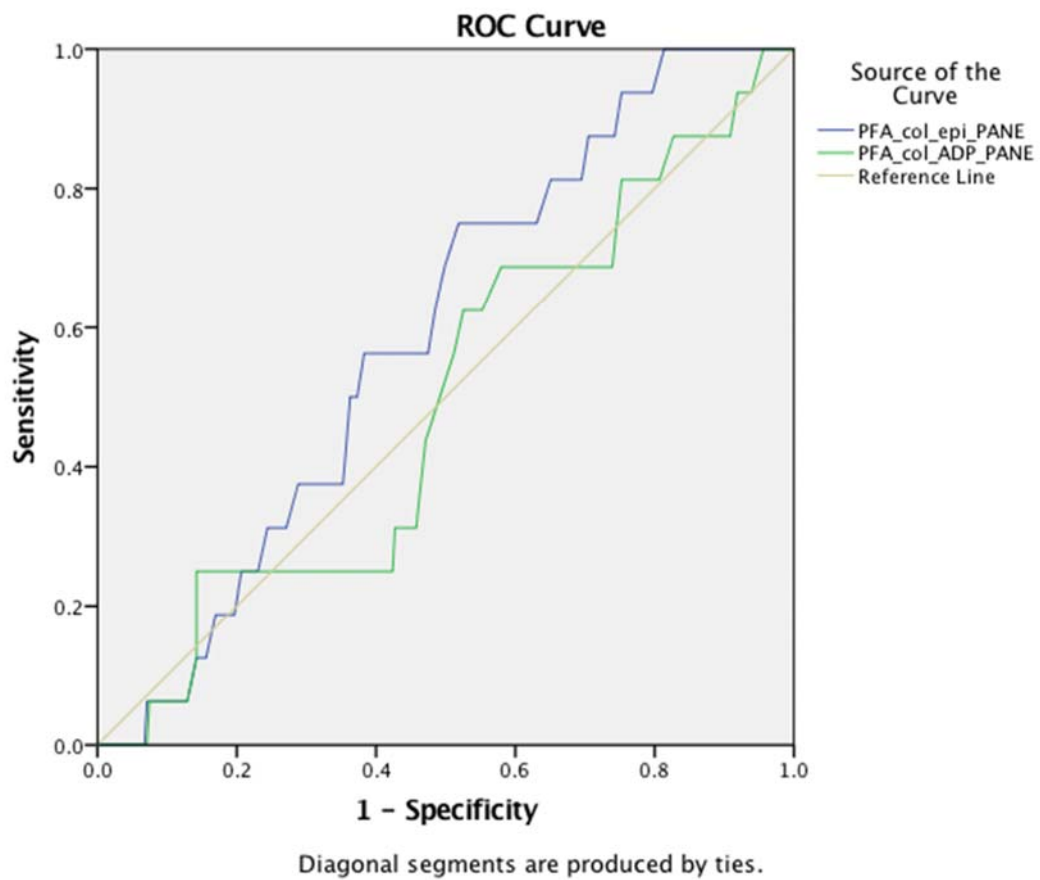

**PFA COL-EPI: N=314 with 16 positive LTA COL results. AUC 0.59, 95%CI 0.48-0.71, p=0.22**

**PFA COL-ADP: N=312 with 16 positive LTA COL results. AUC 0.50, 95% CI 0.36-0.63, p=0.96**

**Preoperative patients LTA ADP – PFA C-ADP**

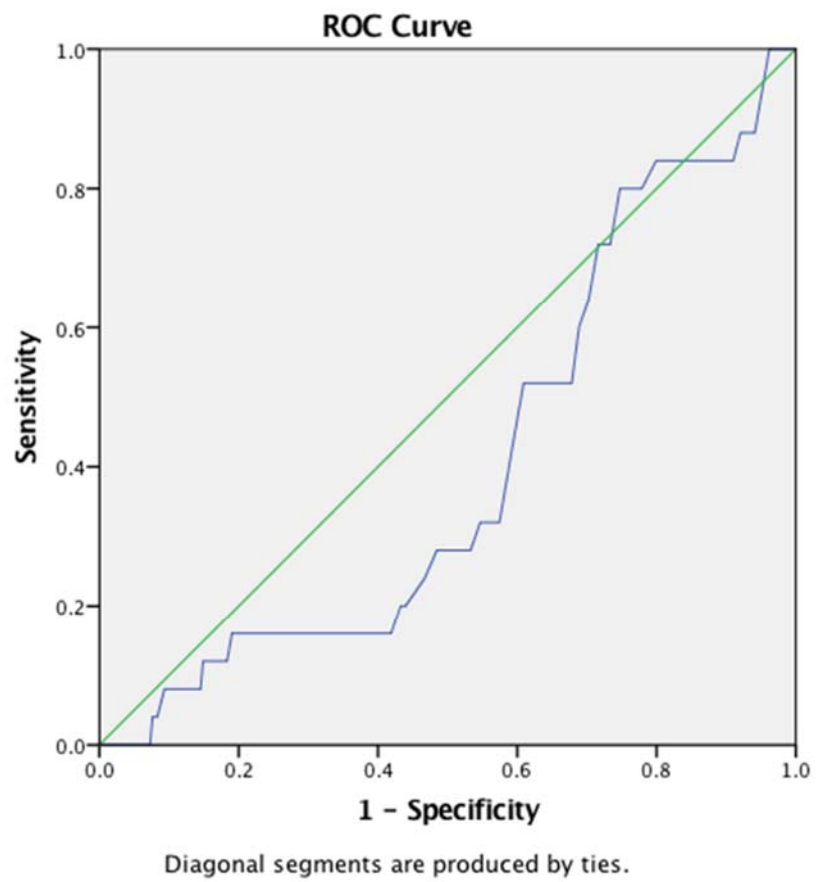

**N=314 with 25 positive LTA ADP results. AUC 0.41, 95%CI 0.30-0.51, p=0.12**

**Preoperative patients LTA EPI – PFA C-EPI**

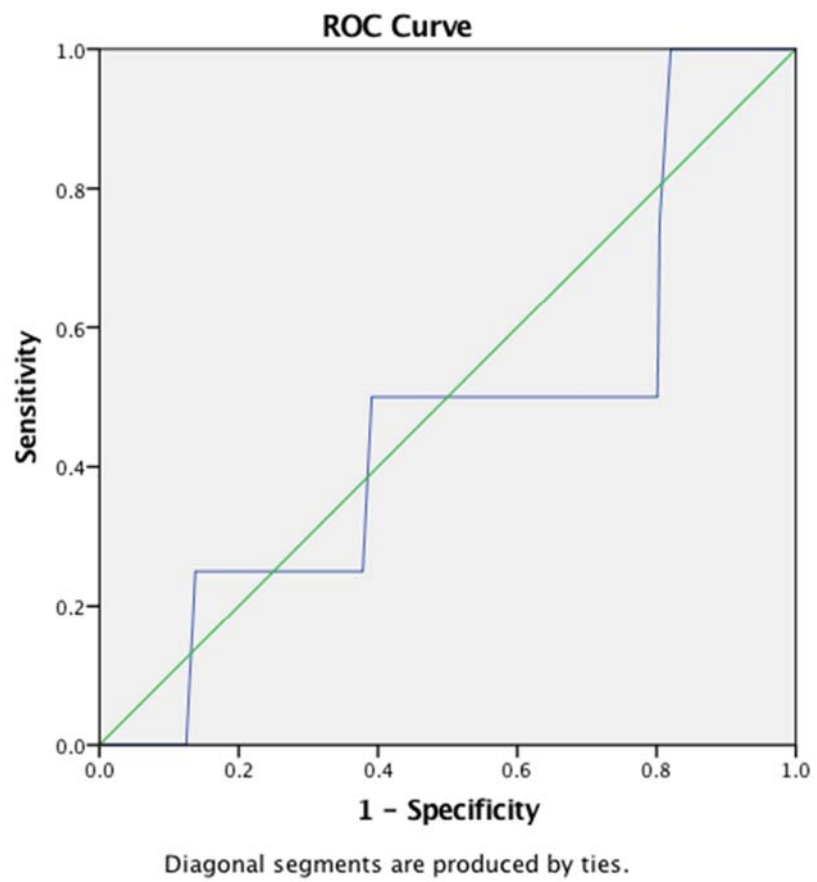

**N=316 with 4 positive LTA EPI results. AUC 0.47, 95%CI 0.18-0.75, p=0.82**

**Patients referred for bleeding evaluation LTA COL - PFA C-ADP / C-EPI**

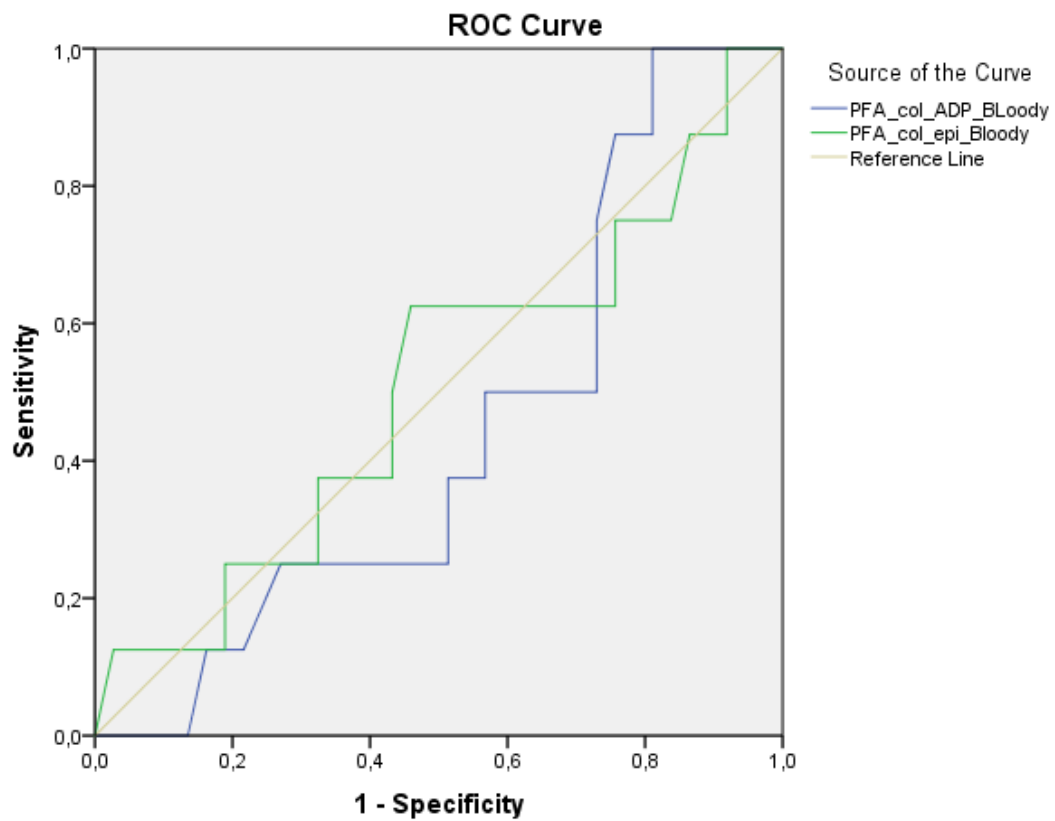

**PFA COL-EPI: N=48 with 8 positive LTA COL results. AUC 0.51 95%CI 0.28-0.74, p = 0.94**

**PFA COL-ADP: N=45 with 8 positive LTA COL results. AUC 0.44 95%CI 0.24-0.64, p = 0.59**



**Patients referred for bleeding evaluation LTA ADP - PFA C-ADP**

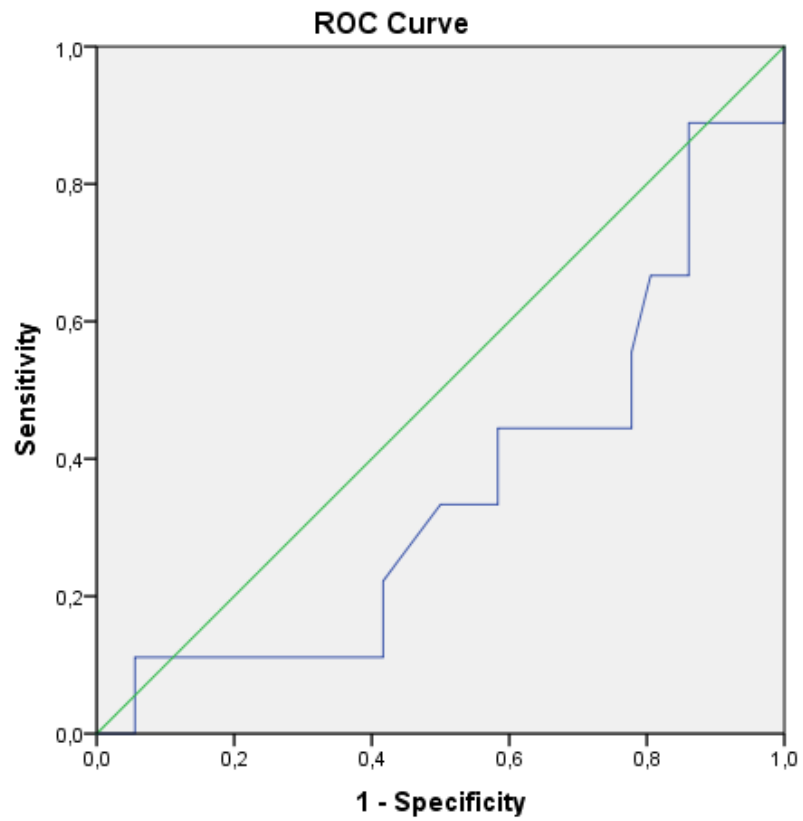

Diagonal segments are produced by ties.

**N=45 with 9 positive LTA ADP results. AUC 0.36 95%CI 0.15-0.56, p = 0.18**

**Patients referred for bleeding evaluation LTA EPI - PFA C-EPI**

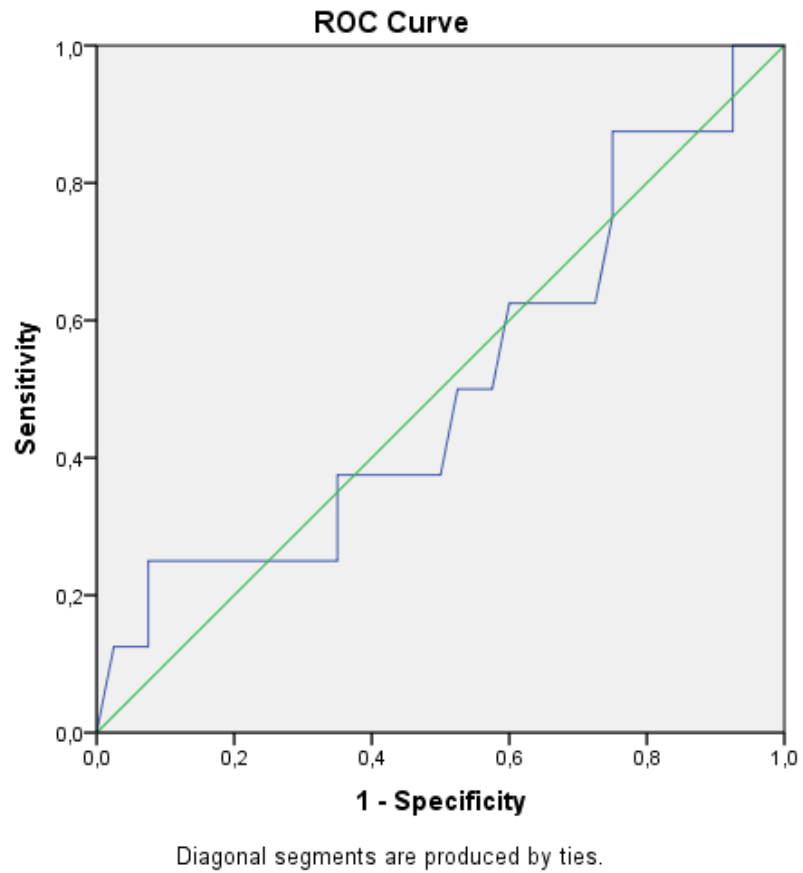

**N=48 with 8 positive LTA EPI results. AUC 0.51 95%CI 0.27-0.74, p = 0.96**

**Patients with a diagnosed bleeding disorder LTA COL - PFA C-ADP/C-EPI**

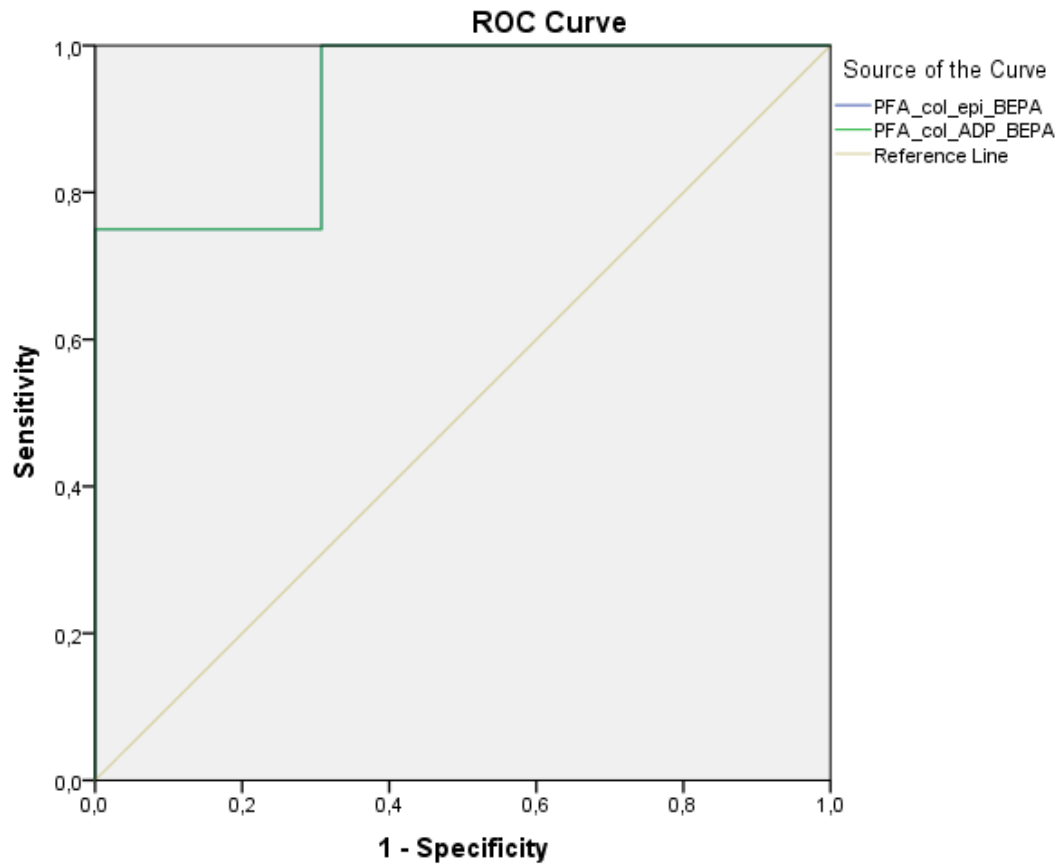

**PFA COL-EPI: N=17 with 4 positive LTA COL results. AUC 0.92 95%CI 0.77-1.00, p = 0.08**

**PFA COL-ADP: N=17 with 4 positive LTA COL results. AUC 0.92 95%CI 0.77-1.00, p = 0.08**

**Patients with a diagnosed bleeding disorder LTA ADP - PFA C-ADP**

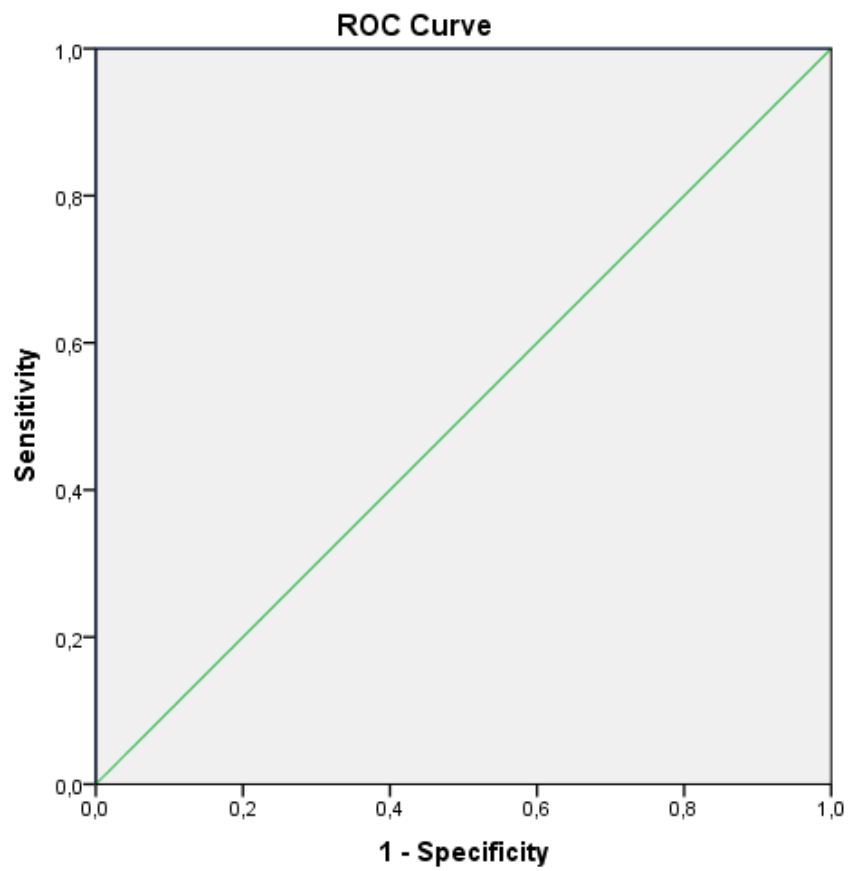

**N=17 with 3 positive LTA ADP results. AUC 1.00 95%CI 1.00-1.00, p = 0.01**

Patients with a diagnosed bleeding disorder LTA EPI - PFA C-EPI

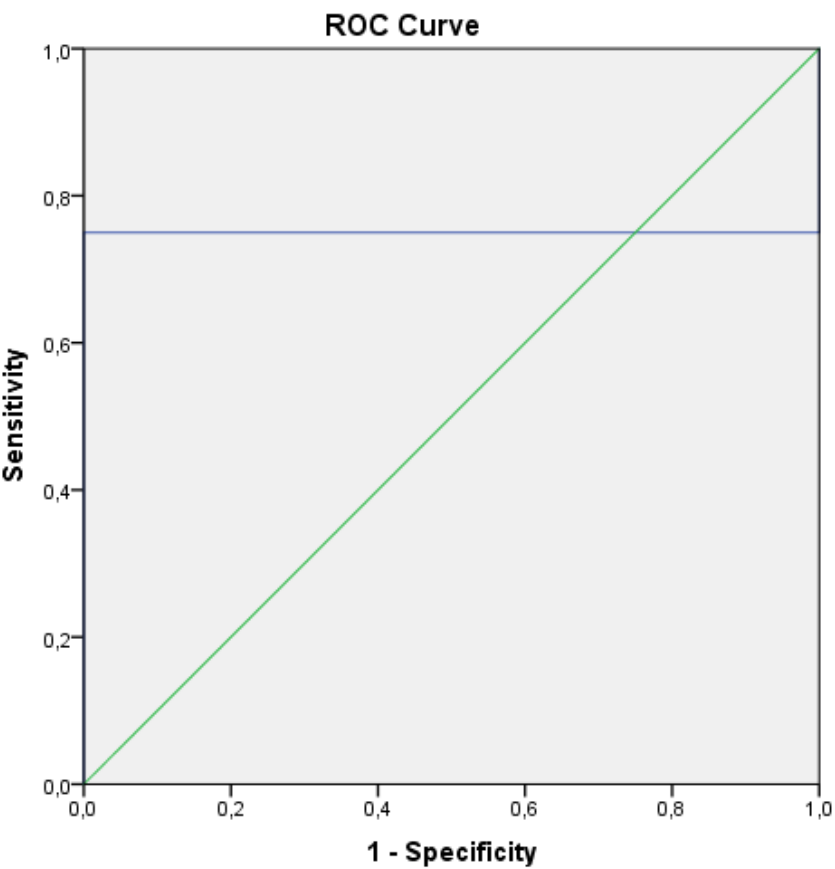

N=17 with 3 positive LTA EPI results. AUC 0.74 95%CI 0.33-1.00, p = 0.14
