# Supplementary material
Source: publisher figshare collection journal article supplement (https://tandf.figshare.com/articles/dataset/_/5598757)
Supplement: Supplementary file 4 [file 1]

Archive with 5 entries (5 files):
- iplt_a_1371290_sm1932.pdf
- iplt_a_1371290_sm1924.pdf
- iplt_a_1371290_sm1914.pdf
- iplt_a_1371290_sm1905.pdf
- iplt_a_1371290_sm1895.pdf
