# Supplementary material
Source: publisher figshare collection journal article supplement (https://tandf.figshare.com/articles/dataset/_/5598757)
Supplement: Supplementary file 4 [file 1 › iplt_a_1371290_sm1914.pdf]

### Supplemental File 3.

#### Number of platelet function test results available for analyses

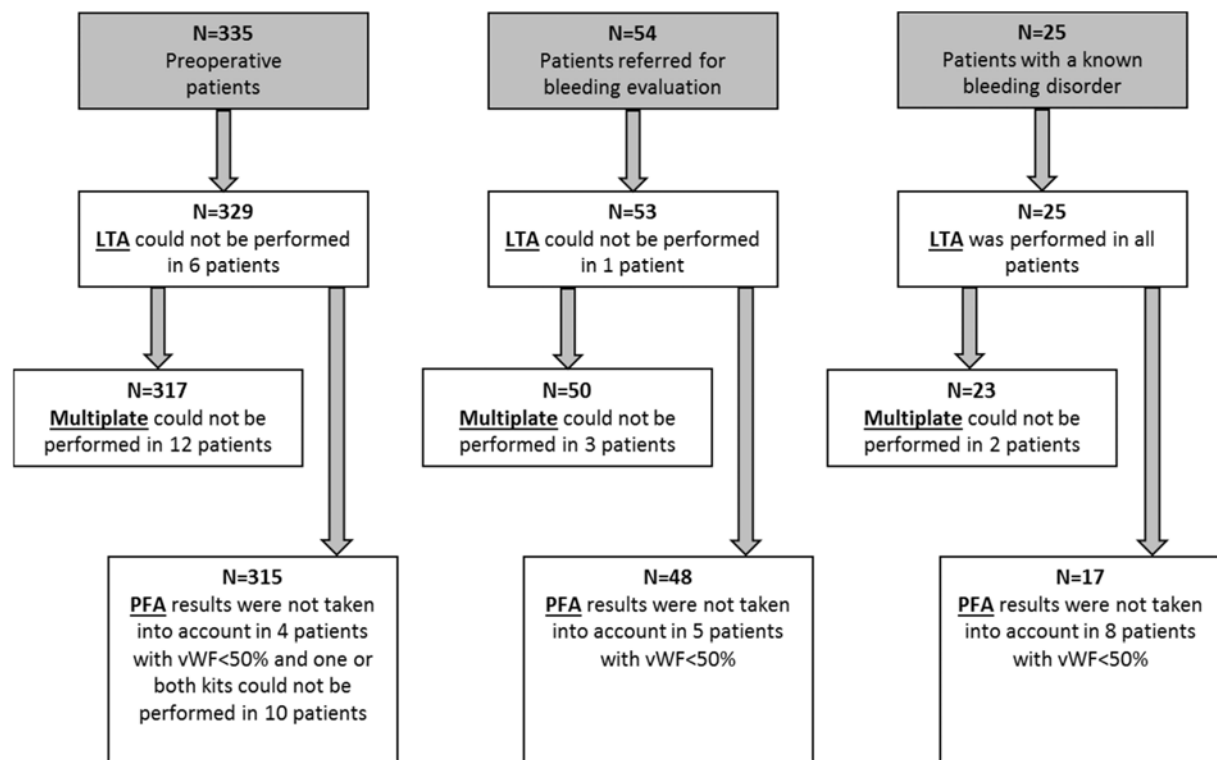

**Legend:** This diagram shows the number of platelet function test results that were available for the LTA-Multiplate and LTA-PFA comparisons.

**Abbreviations:** PFA; platelet function analyzer. LTA; light transmission aggregometry. vWF; von Willebrand Factor.
